# Supplementary material for: A high performance organic photovoltaic utilizing PEDOT:PSS and graphene oxide
Source: Royal Society of Chemistry journal article supplement (doi:10.1039/c6ra04376c), 2016-01-01
Supplement: c6ra04376c1.pdf [file c6ra04376c1.pdf]

## Supporting Information

### High performance organic photovoltaic utilizing PEDOT:PSS and graphene oxide

H. P. Kim, S. J. Lee, A. R. B. M. Yusoff\*, J. Jang

#### Experimental Section

*Anode Interfacial Layer Solutions Preparation.* PEDOT:PSS (CLEVIOS P VP Al 4083) was purchased from H. C. Starck and used without any further purification. PEDOT:PSS:WO<sub>x</sub>, PEDOT:PSS:MoO<sub>x</sub>, PEDOT:PSS:GO, PEDOT:PSS:CNT solutions were prepared by mixing PEDOT:PSS with their respective materials in 1:1, 1:1, 20:1, and 20:1 volume ratio, respectively. Prior to the film deposition, the prepared solutions were filtered through a 0.45 μm hydrophilic filter.

*Solar Cell Fabrication.* The ITO glass substrate was cleaned by ultrasonic treatment in acetone, methanol, isopropanol, and deionized water sequentially. The pre-cleaned ITO substrate was treated in an ultraviolet-ozone chamber (Ultraviolet Ozone Cleaner, Jetlight Company, USA) for 15 min. All anode interfacial layers (PEDOT:PSS, PEDOT:PSS:WO<sub>x</sub>, PEDOT:PSS:MoO<sub>x</sub>, PEDOT:PSS:GO, and PEDOT:PSS:CNT) were deposited at 4000 rpm for 25 s on the ITO electrode. The interfacial layer was annealed inside the glove box at 130 °C for 20 min. Later, the photoactive layer was prepared by spin coating (500 rpm) a 1,2-dichlorobenzene solution of PTB7 and a fullerene (PC<sub>71</sub>BM) (1:1.5 w/w, polymer concentration 12 mg/2mL<sup>-1</sup>) on the anode interfacial layer for 25 s. The thickness of the active layer was around 90 nm. For the PBDTTT-EFT:PC<sub>71</sub>BM OPVs, the active layer was spin-coated at 500 rpm for 60 s (1:1.5 w/w, polymer concentration 15 mg/mL) on the anode interfacial layer. The thickness of PBDTTT-EFT:PC<sub>71</sub>BM was approximately 95 nm. Later, PFN solution was filtered through

a 0.45  $\mu\text{m}$  polyvinylidene fluoride (PVDF) filter and spin-coated at 4000 rpm for 25 s on the photoactive layer. The thickness of the PFN was  $< 5$  nm. Finally, the substrate was transferred to a vacuum chamber and 100 nm of Al was thermally deposited on the PFN cathode buffer layer under a base pressure of  $1 \times 10^{-7}$  Torr. The active area of the device was  $0.04 \text{ cm}^2$ .

*Solar Cell Measurements.* The power conversion efficiencies of the OPVs were measured under the illumination of AM1.5G simulated solar light (Oriel Model 91192) at  $100 \text{ mW/cm}^2$ . The current density–voltage ( $J$ – $V$ ) characteristics were recorded with a Keithley 2410 source unit. The EQE measurements were performed using EQE system (Model 74000) obtained from Newport Oriel Instruments USA and HAMAMATSU calibrated silicon cell photodiode used as a reference diode. The wavelength was controlled with a monochromator 200–1600 nm. For the UPS measurements, the HTLs were deposited on pre-cleaned ITO substrate. The UPS analysis chamber was equipped with a hemispherical electron-energy analyzer (Kratos Ultra Spectrometer), and was maintained at  $1.33 \times 10^{-7}$  Pa. UPS measurements were performed using He I ( $h\nu=21.2 \text{ eV}$ ) source. The electron-energy analyzer was operated at constant pass energy of 10 eV (for UPS). During the UPS measurements, a sample bias of -9 V was used in order to separate the sample and the secondary edge for the analyzer.

**Table 1.** Photovoltaic parameters of conventional organic photovoltaics with different anode interfacial layers.

| Anode interfacial layer    | $J_{sc}$ (mA/cm <sup>2</sup> ) | $V_{oc}$ (V) | FF (%) | PCE (%) | $R_s$ ( $\Omega$ .cm <sup>2</sup> ) | $R_{sh}$ ( $\Omega$ .cm <sup>2</sup> ) |
|----------------------------|--------------------------------|--------------|--------|---------|-------------------------------------|----------------------------------------|
| PEDOT:PSS                  | 14.5                           | 0.75         | 66.9   | 7.27    | 7.62                                | 714.3                                  |
| PEDOT:PSS:WO <sub>x</sub>  | 14.5                           | 0.73         | 66.6   | 7.07    | 7.55                                | 693.1                                  |
| PEDOT:PSS:MoO <sub>x</sub> | 11.4                           | 0.73         | 64.2   | 5.33    | 8.86                                | 457.5                                  |
| PEDOT:PSS:GO               | 14.9                           | 0.75         | 68.3   | 7.53    | 7.50                                | 702.9                                  |
| PEDOT:PSS:CNT              | 14.8                           | 0.74         | 68.1   | 7.48    | 6.26                                | 533.3                                  |

**Table 2.** Summary of photovoltaic parameters based on PBDTTT-EFT:PC<sub>71</sub>BM with different anode interfacial layer.

| Anode interfacial layer    | $J_{sc}$ (mA/cm <sup>2</sup> ) | $V_{oc}$ (V) | FF (%) | PCE (%) | $R_s$ ( $\Omega$ .cm <sup>2</sup> ) | $R_{sh}$ ( $\Omega$ .cm <sup>2</sup> ) |
|----------------------------|--------------------------------|--------------|--------|---------|-------------------------------------|----------------------------------------|
| PEDOT:PSS                  | 16.1                           | 0.81         | 66.4   | 8.75    | 8.63                                | 675.7                                  |
| PEDOT:PSS:WO <sub>x</sub>  | 16.6                           | 0.81         | 65.8   | 8.85    | 8.15                                | 574.7                                  |
| PEDOT:PSS:MoO <sub>x</sub> | 16.0                           | 0.81         | 62.7   | 8.16    | 9.06                                | 423.7                                  |
| PEDOT:PSS:GO               | 16.9                           | 0.81         | 66.5   | 9.12    | 8.94                                | 714.3                                  |
| PEDOT:PSS:CNT              | 16.2                           | 0.81         | 65.8   | 8.67    | 8.29                                | 674.3                                  |

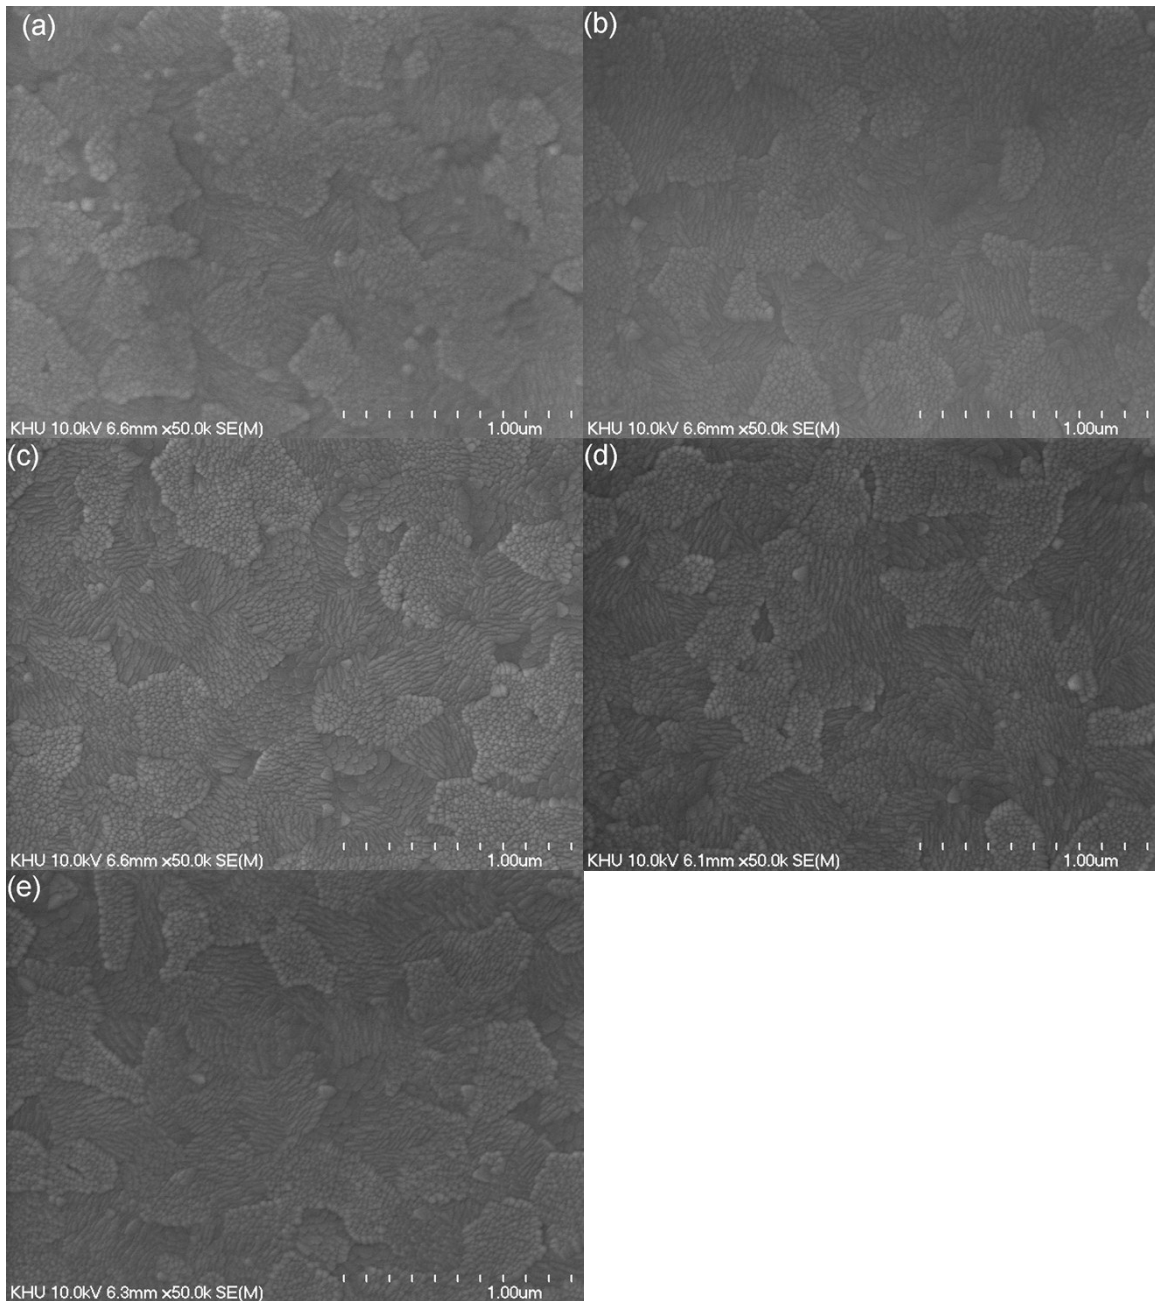

**Figure S1.** SEM images displaying the different film surface morphologies of (a) PEDOT:PSS, (b) PEDOT:PSS:WO<sub>x</sub>, (c) PEDOT:PSS:MoO<sub>x</sub>, (d) PEDOT:PSS:GO, and (e) PEDOT:PSS:CNT anode interfacial layers.

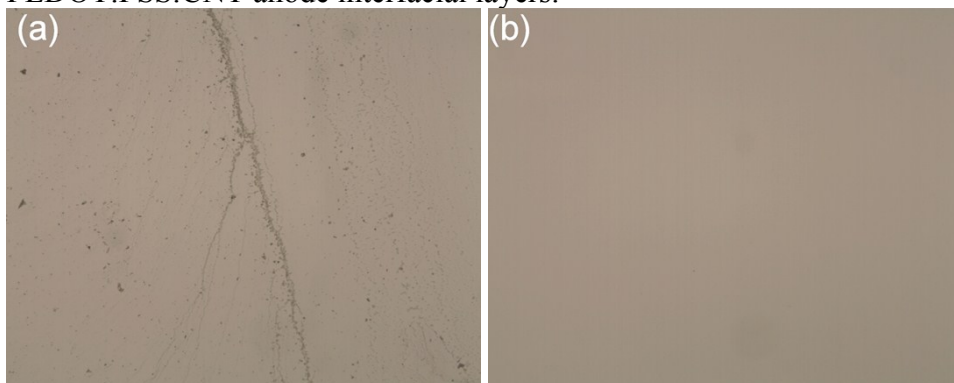

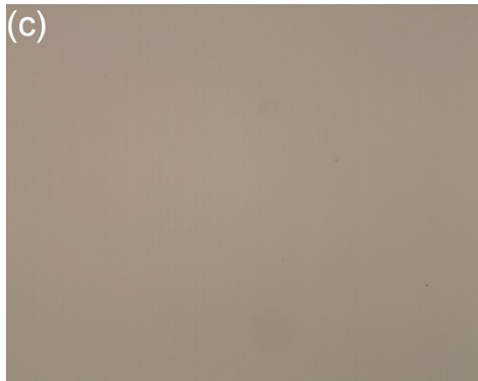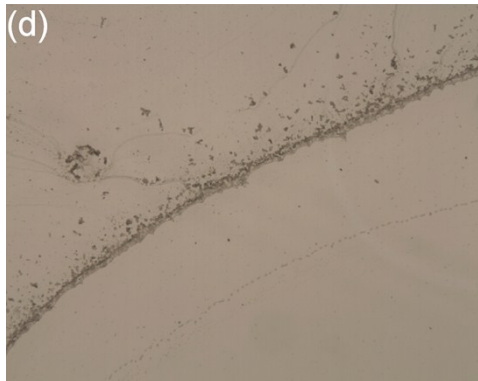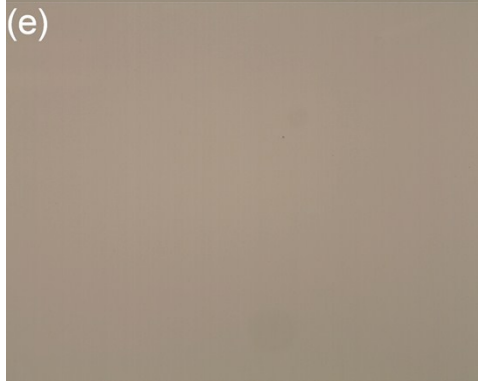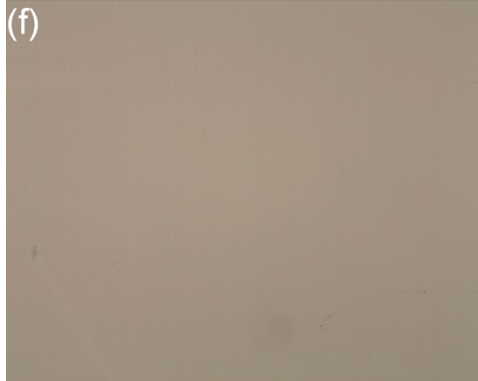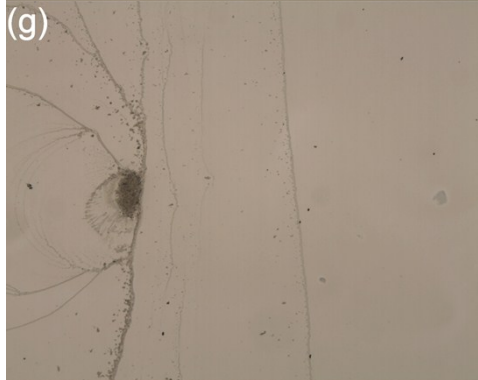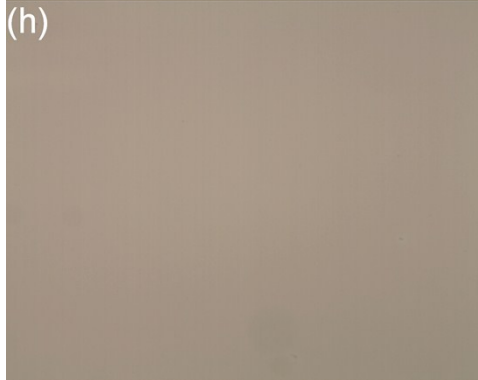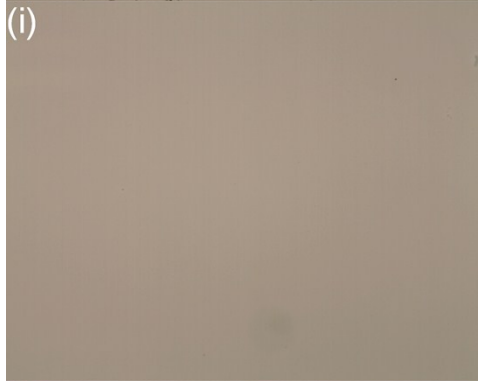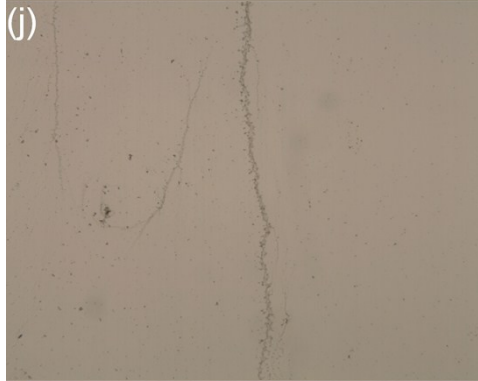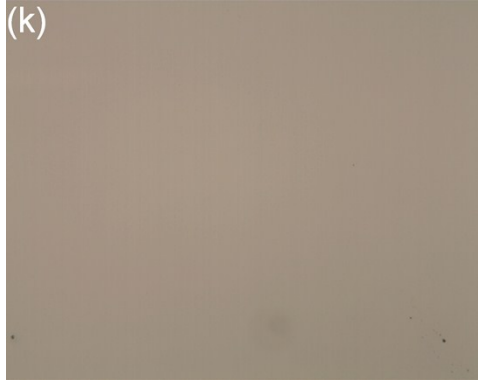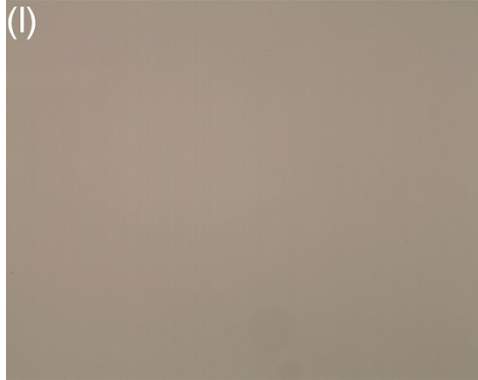

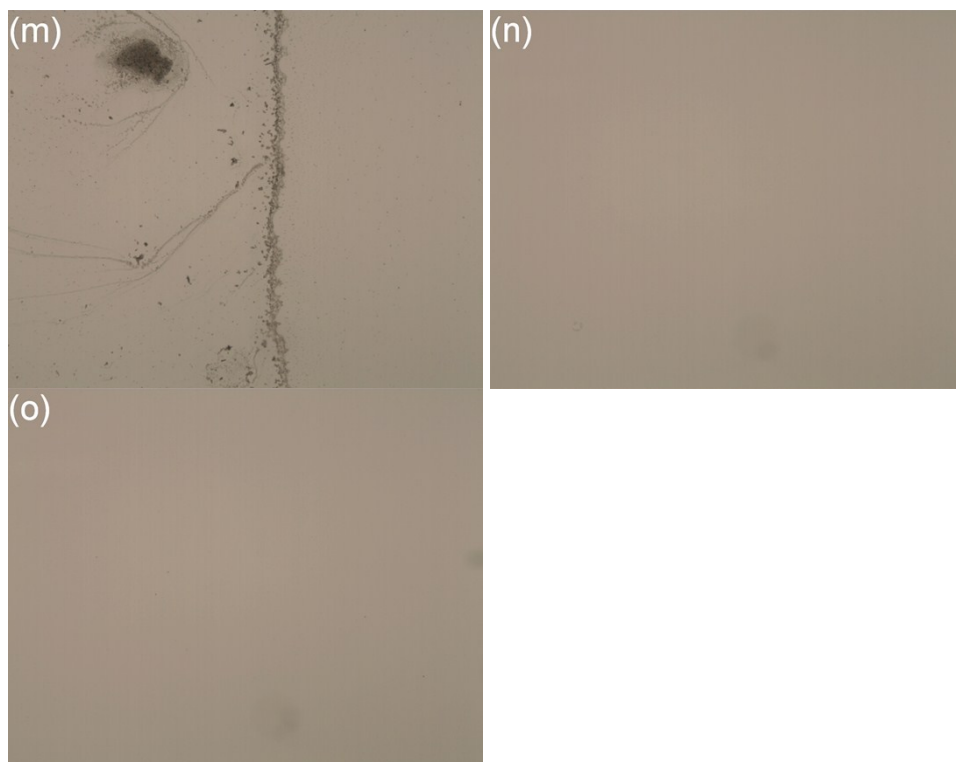

**Figure S2.** (a,d,g,j,m) PEDOT:PSS, PEDOT:PSS:WO<sub>x</sub>, PEDOT:PSS:MoO<sub>x</sub>, PEDOT:PSS:CNT, and PEDOT:PSS:GO layers treated with chlorobenzene, (b,e,h,k,n) PEDOT:PSS, PEDOT:PSS:WO<sub>x</sub>, PEDOT:PSS:MoO<sub>x</sub>, PEDOT:PSS:CNT, and PEDOT:PSS:GO layers treated with dichlorobenzene, and (c,f,i,l,o) PEDOT:PSS, PEDOT:PSS:WO<sub>x</sub>, PEDOT:PSS:MoO<sub>x</sub>, PEDOT:PSS:CNT, and PEDOT:PSS:GO layers treated with trichlorobenzene.
